# Supplementary material
Source: PubMed Central journal article supplement (PMC6060210)
Supplement: 12264_2018_253_MOESM1_ESM.pdf [file 12264_2018_253_MOESM1_ESM.pdf]

## Supplementary Material

**Table S1. Detailed clinical information of the participants**

| Patient | Age | Gender | Handness | Etiology | Days post ictus | GCS | CRS-R | GOS |
|---------|-----|--------|----------|----------|-----------------|-----|-------|-----|
| COMA1   | 46  | Male   | Right    | TBI      | 19              | 5   | 2     | 2   |
| COMA2   | 24  | Male   | Right    | TBI      | 15              | 8   | 7     | 5   |
| COMA3   | 50  | Male   | Right    | TBI      | 42              | 7   | 4     | 2   |
| COMA4   | 37  | Male   | Right    | TBI      | 21              | 7   | 3     | 3   |
| COMA5   | 46  | Male   | Right    | TBI      | 25              | 6   | 2     | 4   |
| COMA6   | 47  | Male   | Right    | TBI      | 13              | 7   | 5     | 3   |
| COMA7   | 39  | Female | Right    | TBI      | 27              | 8   | 6     | 2   |
| COMA8   | 49  | Female | Right    | TBI      | 17              | 7   | 5     | 3   |
| VS1     | 49  | Male   | Right    | TBI      | 140             | 6   | 5     | 2   |
| VS2     | 36  | Female | Right    | non-TBI  | 182             | 9   | 5     | 2   |
| VS3     | 59  | Male   | Right    | TBI      | 44              | 8   | 4     | 2   |
| VS4     | 67  | Female | Right    | TBI      | 10              | 6   | 4     | 2   |
| VS5     | 38  | Female | Right    | TBI      | 31              | 9   | 6     | 3   |
| VS6     | 23  | Female | Right    | TBI      | 168             | 8   | 4     | 3   |
| VS7     | 52  | Female | Right    | non-TBI  | 52              | 7   | 5     | 2   |
| VS8     | 47  | Male   | Right    | TBI      | 163             | 8   | 5     | 3   |
| MCS1    | 30  | Female | Right    | TBI      | 26              | 9   | 10    |     |
| MCS2    | 24  | Male   | Right    | TBI      | 16              | 9   | 12    |     |
| MCS3    | 18  | Male   | Right    | TBI      | 31              | 9   | 6     |     |
| MCS4    | 49  | Male   | Right    | TBI      | 98              | 10  | 16    |     |
| MCS5    | 55  | Male   | Right    | TBI      | 18              | 9   | 7     |     |
| MCS6    | 46  | Male   | Right    | TBI      | 15              | 9   | 7     |     |
| MCS7    | 63  | Female | Right    | TBI      | 28              | 9   | 13    |     |
| MCS8    | 60  | Male   | Right    | TBI      | 20              | 9   | 10    |     |
| MCS9    | 18  | Male   | Right    | TBI      | 15              | 9   | 14    |     |
| MCS10   | 31  | Female | Right    | TBI      | 73              | 10  | 9     |     |
| MCS11   | 67  | Male   | Right    | non-TBI  | 18              | 9   | 8     |     |
| MCS12   | 37  | Male   | Right    | TBI      | 82              | 8   | 13    |     |
| MCS13   | 48  | Male   | Right    | TBI      | 19              | 9   | 10    |     |
| MCS14   | 57  | Male   | Right    | TBI      | 21              | 10  | 11    |     |
| PC1     | 42  | Male   | Right    | TBI      | 111             | 11  | 18    |     |
| PC2     | 16  | Female | Right    | TBI      | 16              | 15  | 23    |     |
| PC3     | 47  | Male   | Right    | TBI      | 98              | 15  | 23    |     |
| PC4     | 17  | Male   | Right    | TBI      | 28              | 15  | 23    |     |
| PC5     | 70  | Female | Right    | TBI      | 4               | 15  | 23    |     |
| PC6     | 50  | Male   | Right    | TBI      | 20              | 15  | 23    |     |
| PC7     | 58  | Male   | Right    | TBI      | 10              | 11  | 20    |     |

|      |    |        |       |         |     |    |    |  |
|------|----|--------|-------|---------|-----|----|----|--|
| PC8  | 52 | Female | Right | TBI     | 127 | 15 | 23 |  |
| PC9  | 32 | Male   | Right | TBI     | 68  | 14 | 23 |  |
| PC10 | 41 | Male   | Right | non-TBI | 63  | 15 | 23 |  |
| PC11 | 52 | Male   | Right | TBI     | 6   | 15 | 23 |  |
| PC12 | 29 | Female | Right | TBI     | 118 | 14 | 23 |  |
| PC13 | 30 | Male   | Right | TBI     | 19  | 15 | 23 |  |
| PC14 | 28 | Female | Right | TBI     | 13  | 15 | 23 |  |
| PC15 | 22 | Male   | Right | TBI     | 66  | 15 | 23 |  |
| PC16 | 64 | Male   | Right | TBI     | 7   | 15 | 23 |  |
| PC17 | 28 | Female | Right | TBI     | 4   | 15 | 23 |  |
| PC18 | 42 | Male   | Right | non-TBI | 5   | 11 | 17 |  |
| PC19 | 49 | Male   | Right | TBI     | 167 | 13 | 23 |  |
| PC20 | 29 | Female | Right | TBI     | 5   | 15 | 23 |  |
| PC21 | 22 | Male   | Right | non-TBI | 166 | 15 | 23 |  |
| PC22 | 46 | Male   | Right | TBI     | 58  | 15 | 23 |  |
| PC23 | 25 | Male   | Right | TBI     | 143 | 15 | 23 |  |
| PC24 | 32 | Male   | Right | TBI     | 86  | 12 | 21 |  |
| PC25 | 33 | Male   | Right | TBI     | 119 | 11 | 17 |  |

### Supplementary Figures and Figure Legends

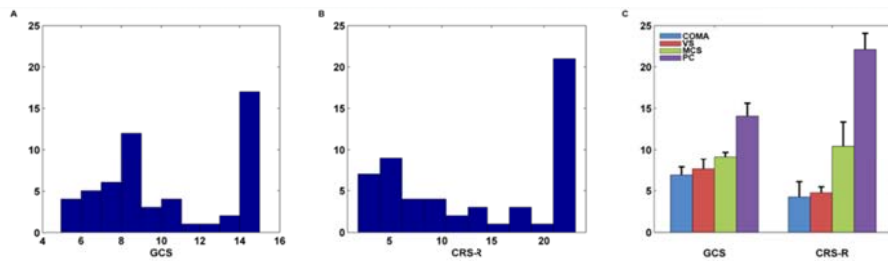

**Fig. S1** Clinical scores of consciousness levels in the DOC patient population. **A**

Distribution of GCS. **B** Distribution of CRS-R. **C** Means and standard deviations of

GCS and CRS-R for each DOC subgroup (blue, COMA; red, VS; green, MCS; purple, PC).

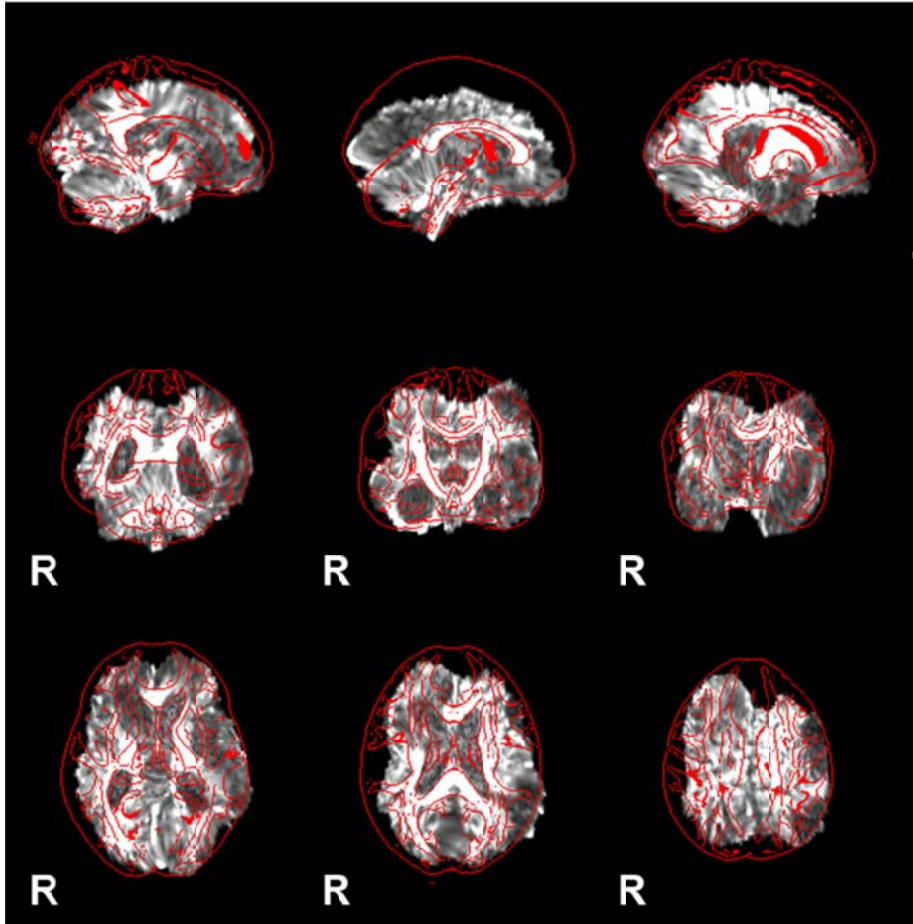

**Fig. S2** Example of excluded standardized FA maps. The red line represents the skeleton of the FMRIB58\_FA template in standard space. Here, we excluded patients for two reasons. One was that the structure of the brain was greatly distorted; the other was that a large brain structure was missing.

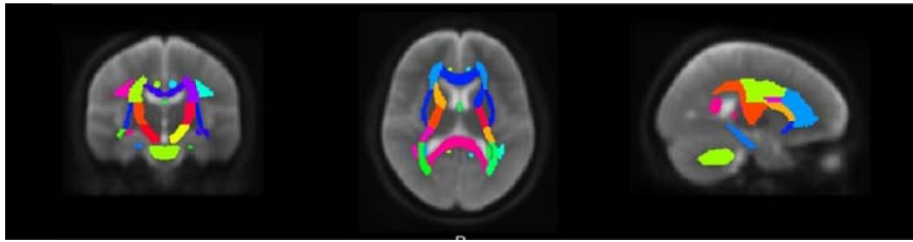

**Fig. S3** View of all 48 WM ROIs deep inside the brain.

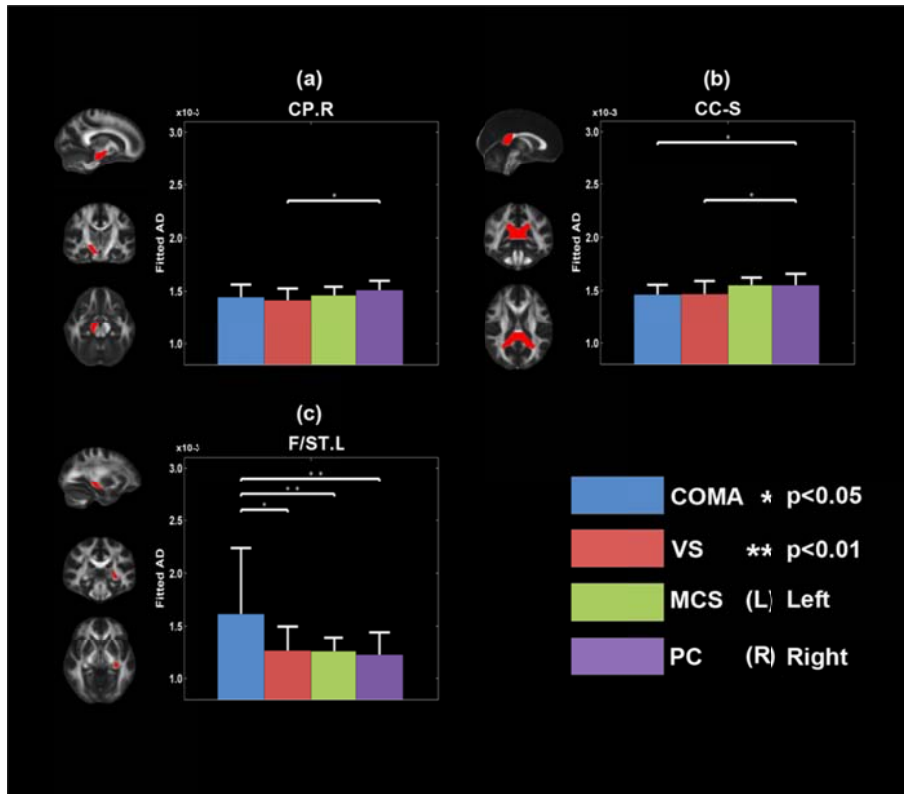

**Fig. S4** Three of 14 consciousness-related WM ROIs detected with further AD ANCOVAs. These ROIs were significantly different in mean AD across levels of consciousness by group comparisons ( $P < 0.05$ , uncorrected). In each subfigure, the left column shows a WM ROI in the standard space indicated by brain areas in red, and the right part shows the fitted mean and standard deviation of AD in the corresponding WM ROI for four DOC subgroups (blue, COMA; red, VS; green, MCS; purple, PC; \* $P < 0.05$ , \*\* $P < 0.01$ ).

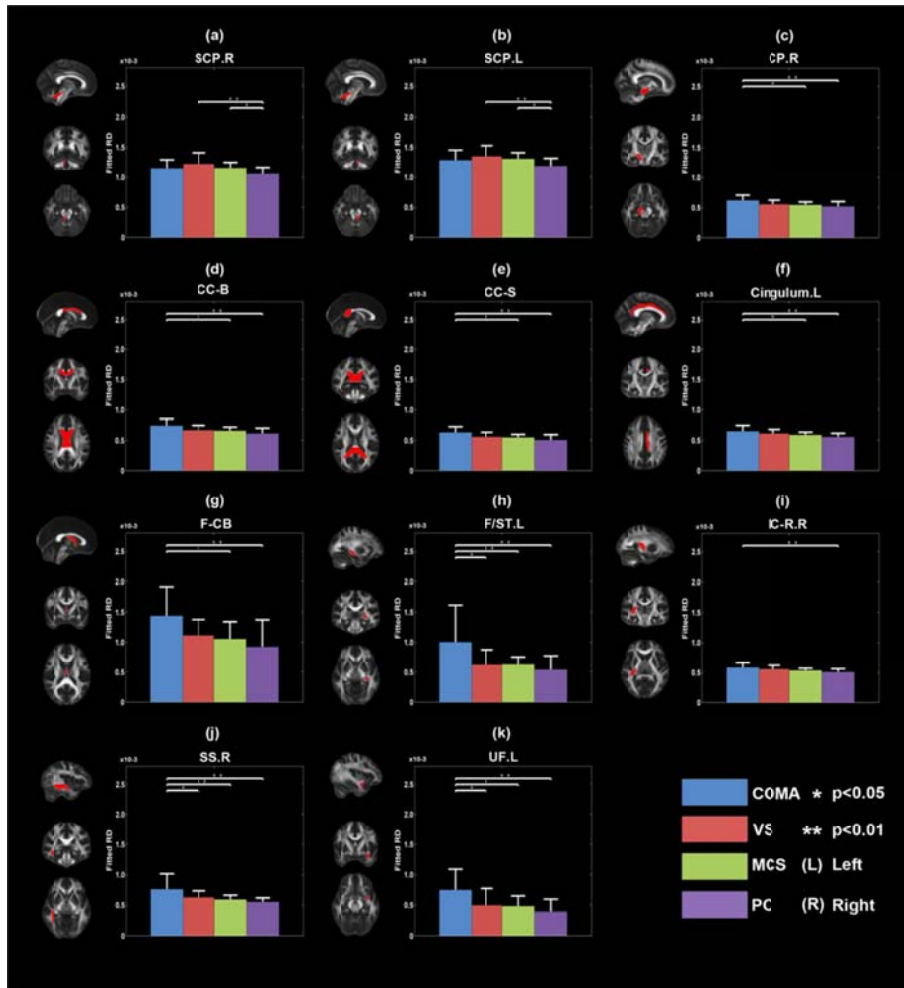

**Fig. S5** Eleven of 14 consciousness-related WM ROIs detected with RD ANCOVAs.

These ROIs were significantly different in mean RD across levels of consciousness by group comparisons ( $P < 0.05$ , uncorrected). In each subfigure, the left column shows a WM ROI in the standard space indicated by brain areas in red, and the right part shows the fitted mean and standard deviation of RD in the corresponding WM ROI for four DOC subgroups (blue, COMA; red, VS; green, MCS; purple, PC; \* $P < 0.05$ , \*\* $P < 0.01$ ).

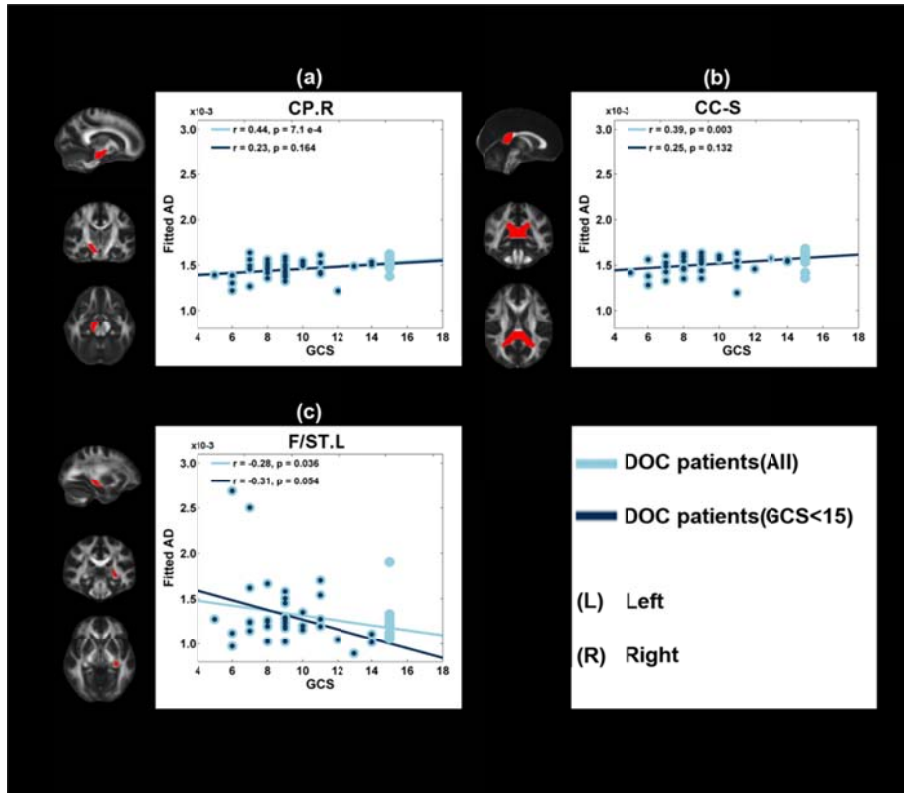

**Fig. S6** Correlations between fitted mean AD and a clinical measure of consciousness level (GCS) for each of the three WM ROIs. Light blue, fitted mean AD of all DOC patients; dark blue, fitted mean AD of DOC patients after the exclusion of those with a GCS score of 15.

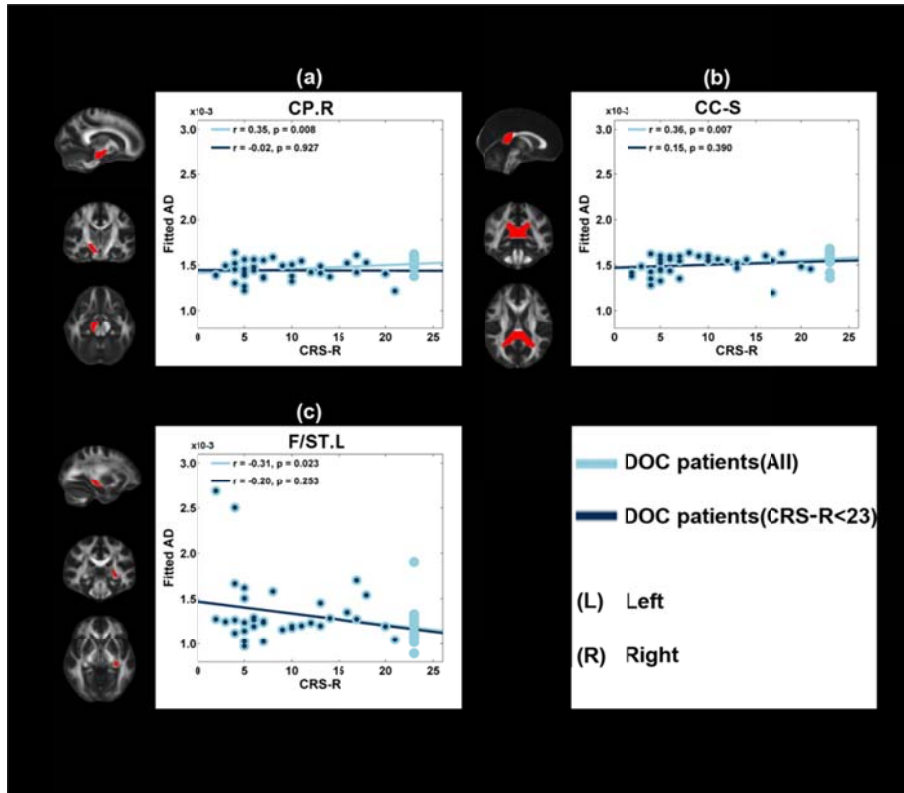

**Fig. S7** Correlations between fitted mean AD and a clinical measure of consciousness level (CRS-R) for each of the three WM ROIs. Light blue, fitted mean AD of all DOC patients; dark blue, fitted mean AD of DOC patients after exclusion of those with a CRS-R score of 23.

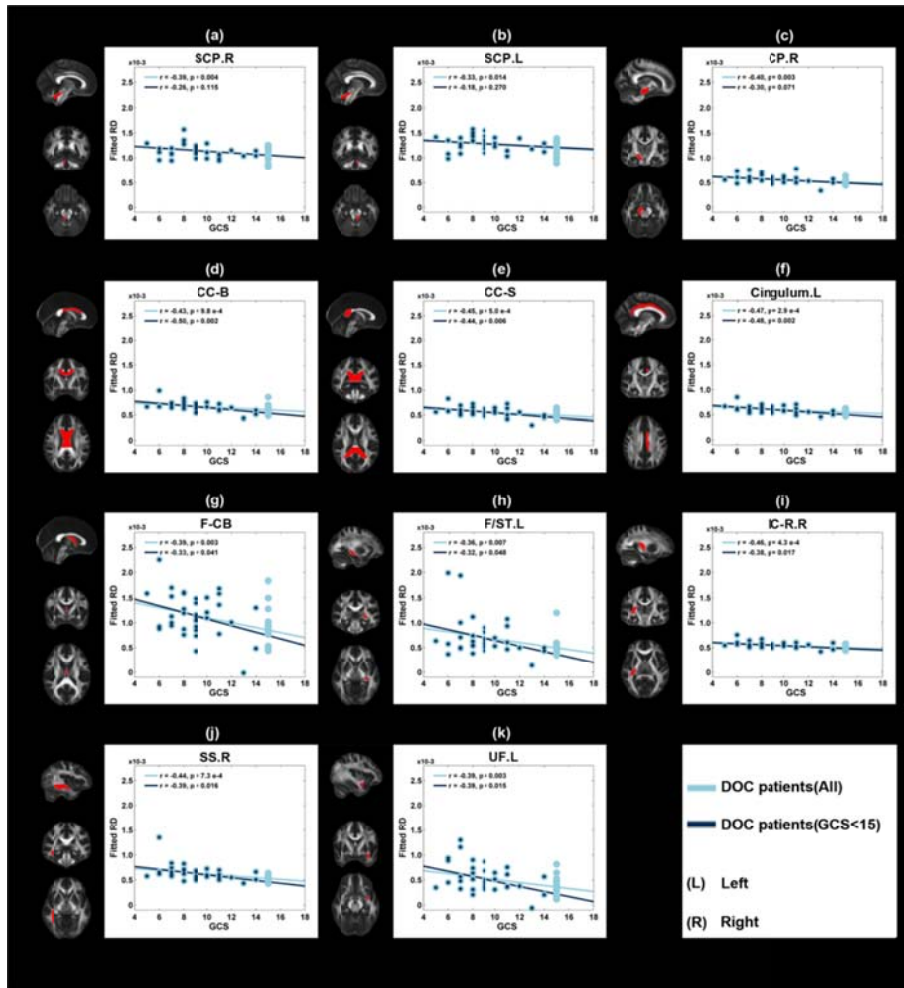

**Fig. S8** Correlations between fitted mean RD and a clinical measure of the consciousness level (GCS) for each of the 11 WM ROIs. Light blue, fitted mean RD of all DOC patients; dark blue, fitted mean RD of DOC patients after exclusion of those with a GCS score of 15.



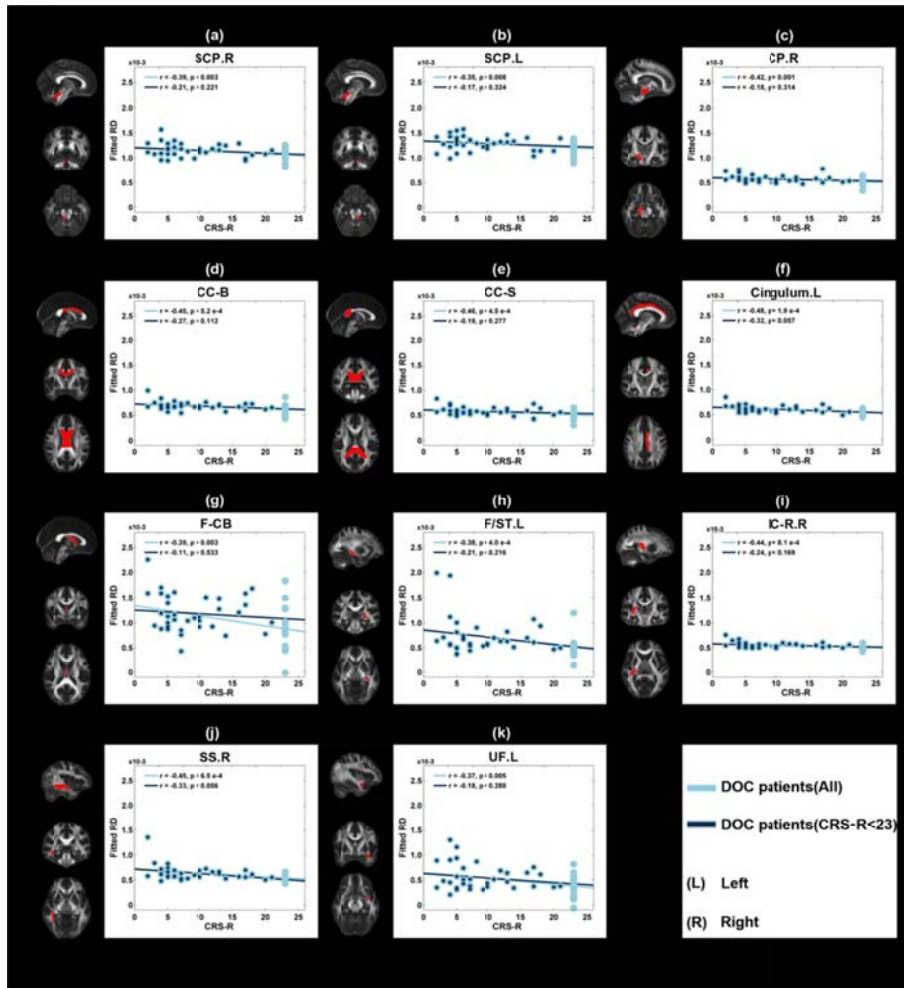

**Fig. S9** Correlations between fitted mean RD and a clinical measure of consciousness level (CRS-R) for each of the 11 WM ROIs. Light blue, fitted mean RD of all DOC patients; dark blue, fitted mean RD of DOC patients after exclusion of those with a CRS-R score of 23.
